# Supplementary material
Source: Research Square preprint supplement (doi:10.21203/rs.3.rs-9153847/v1)
Supplement: Supplementary file 1 [file 422fba6826e70b9c0f7ae2b8.docx]

**Supplementary material**

C3N4/C3N5 homojunction induced peroxymonsulfate activation for efficient oxidation of sulfamethoxazole

Chi Zhoua1, Xuwei Dengb1, Hanmei Zhaoc, Hongyan Songd, Dongqin Wange, Laiyan Wud*

a Hubei Water Resources Research Institute, Hubei Water Resources and Hydropower Science and Technology Promotion Center Wuhan, 430070, China

b Institute of Hydrobiology, Chinese Academy of Sciences, Wuhan, 430072, China

c HuBei Water **Conservancy** Technical College, Wuhan, 430072, China

d College of Resources and Environmental Science, South-Central Minzu University, Wuhan 430074, China

e Wuhan Second Ship Design and Research Institute, Wuhan China 430205

*Corresponding author: wulaiyan@scuec.edu.cn

1. *Characterization.* The Fourier transform infrared (FTIR) spectra were measured on a NEXUIS-470 infrared spectrometer with a wavenumber range of 400–4000 cm⁻¹. The crystal structure (XRD) of the samples were recorded on a Bruker D8 Advance diffractometer with Cu Kα radiation (1.54178 Å) in the 2θ range of 10–80° at a scan rate of 0.02° min−1. The X-ray photoelectron spectra (XPS) were performed on a PerkinElmer PHI-5000C spectrometer with a monochromic Al Kα X-ray source (1486.7 eV), calibrated using the adventitious C 1s peak at 284.8 eV. The Brunauer-Emmett-Teller (BET) surface area were determined  via N₂ adsorption-desorption isotherms on a surface area and porosimetry system (JW-BK132F) at 77 K. The UV–vis diffuse reflection spectra (DRS) were measured on a Shimadzu UV-3600 spectrometer with BaSO4 as reference. The photoluminescence (PL) spectra recorded on a Hitachi F-7000 fluorescence spectrophotometer with an excitation wavelength of 365 nm. The Electrochemical impedance spectroscopy (EIS, 1.6 V), Transient photocurrent response (TPR), linear scanning voltammetry (LSV) curves and Mott-Schottky curves were conducted on a CHI760e workstation (Chenhua Instruments, China) using a three-electrode system (working electrode: catalyst-coated FTO glass; counter electrode: Pt wire; reference electrode: Ag/AgCl). The electrolyte was 0.1 M Na₂SO₄ (pH = 5.95). Electron paramagnetic resonance (EPR) signals were measured at ambient temperature on a Bruker ESR A300 spectrometer using DMPO (for , ) and TEMP (for 1O2 ) as spin traps.


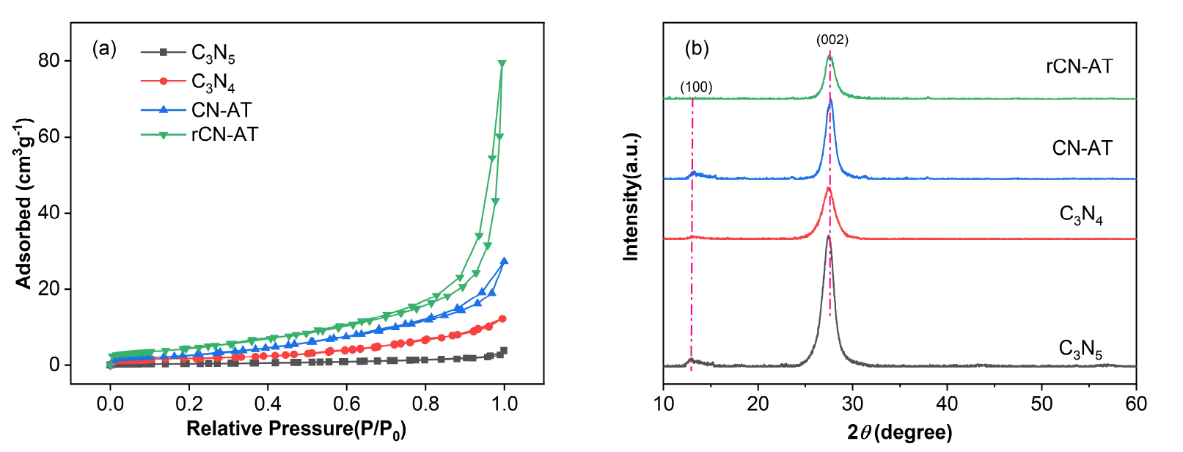


**Fig. S1** nitrogen adsorption-desorption curves (a) and XRD pattern (b) of the as-prepared catalysts.


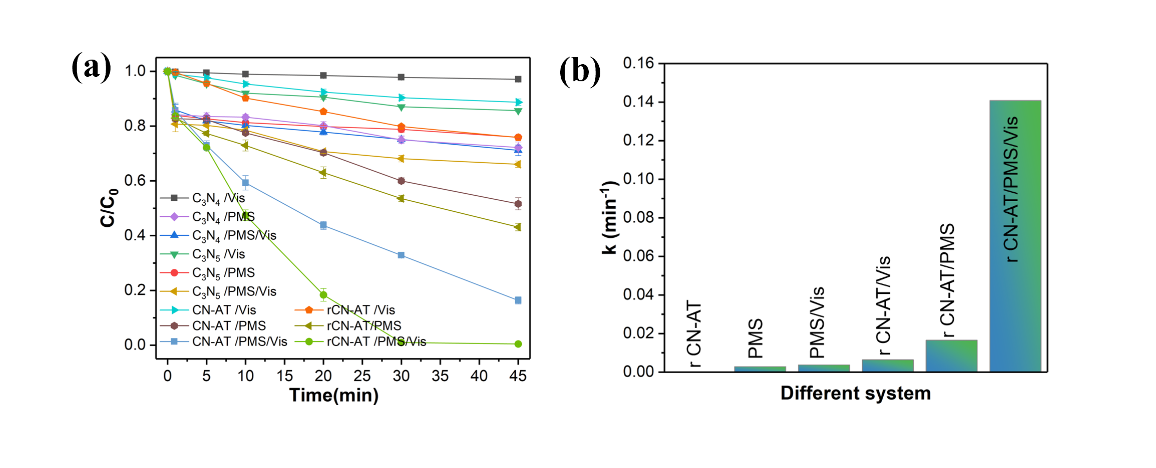


**Fig. S2** Degradation curves of sulfamethoxazole in the presence of different photocatalyst (a) and comparison of the corresponding rate constants (b)


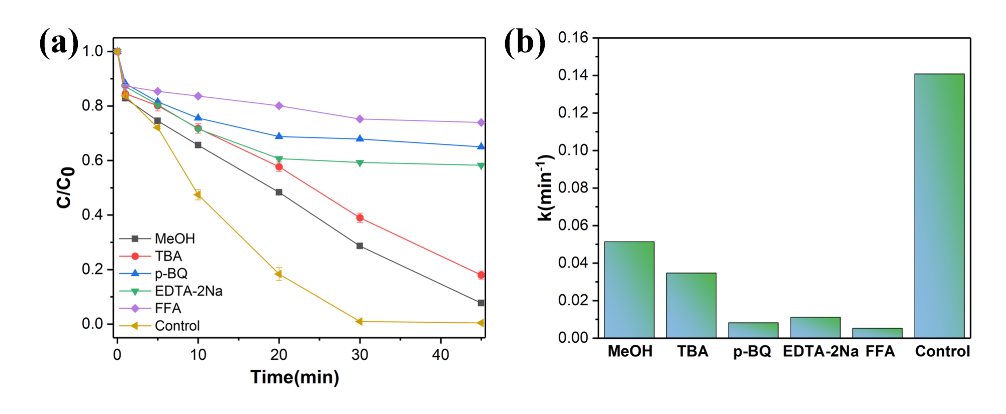


**Fig. S3** Effect of quenchers on SMX degradation in rCN-AT/PMS/Vis system.


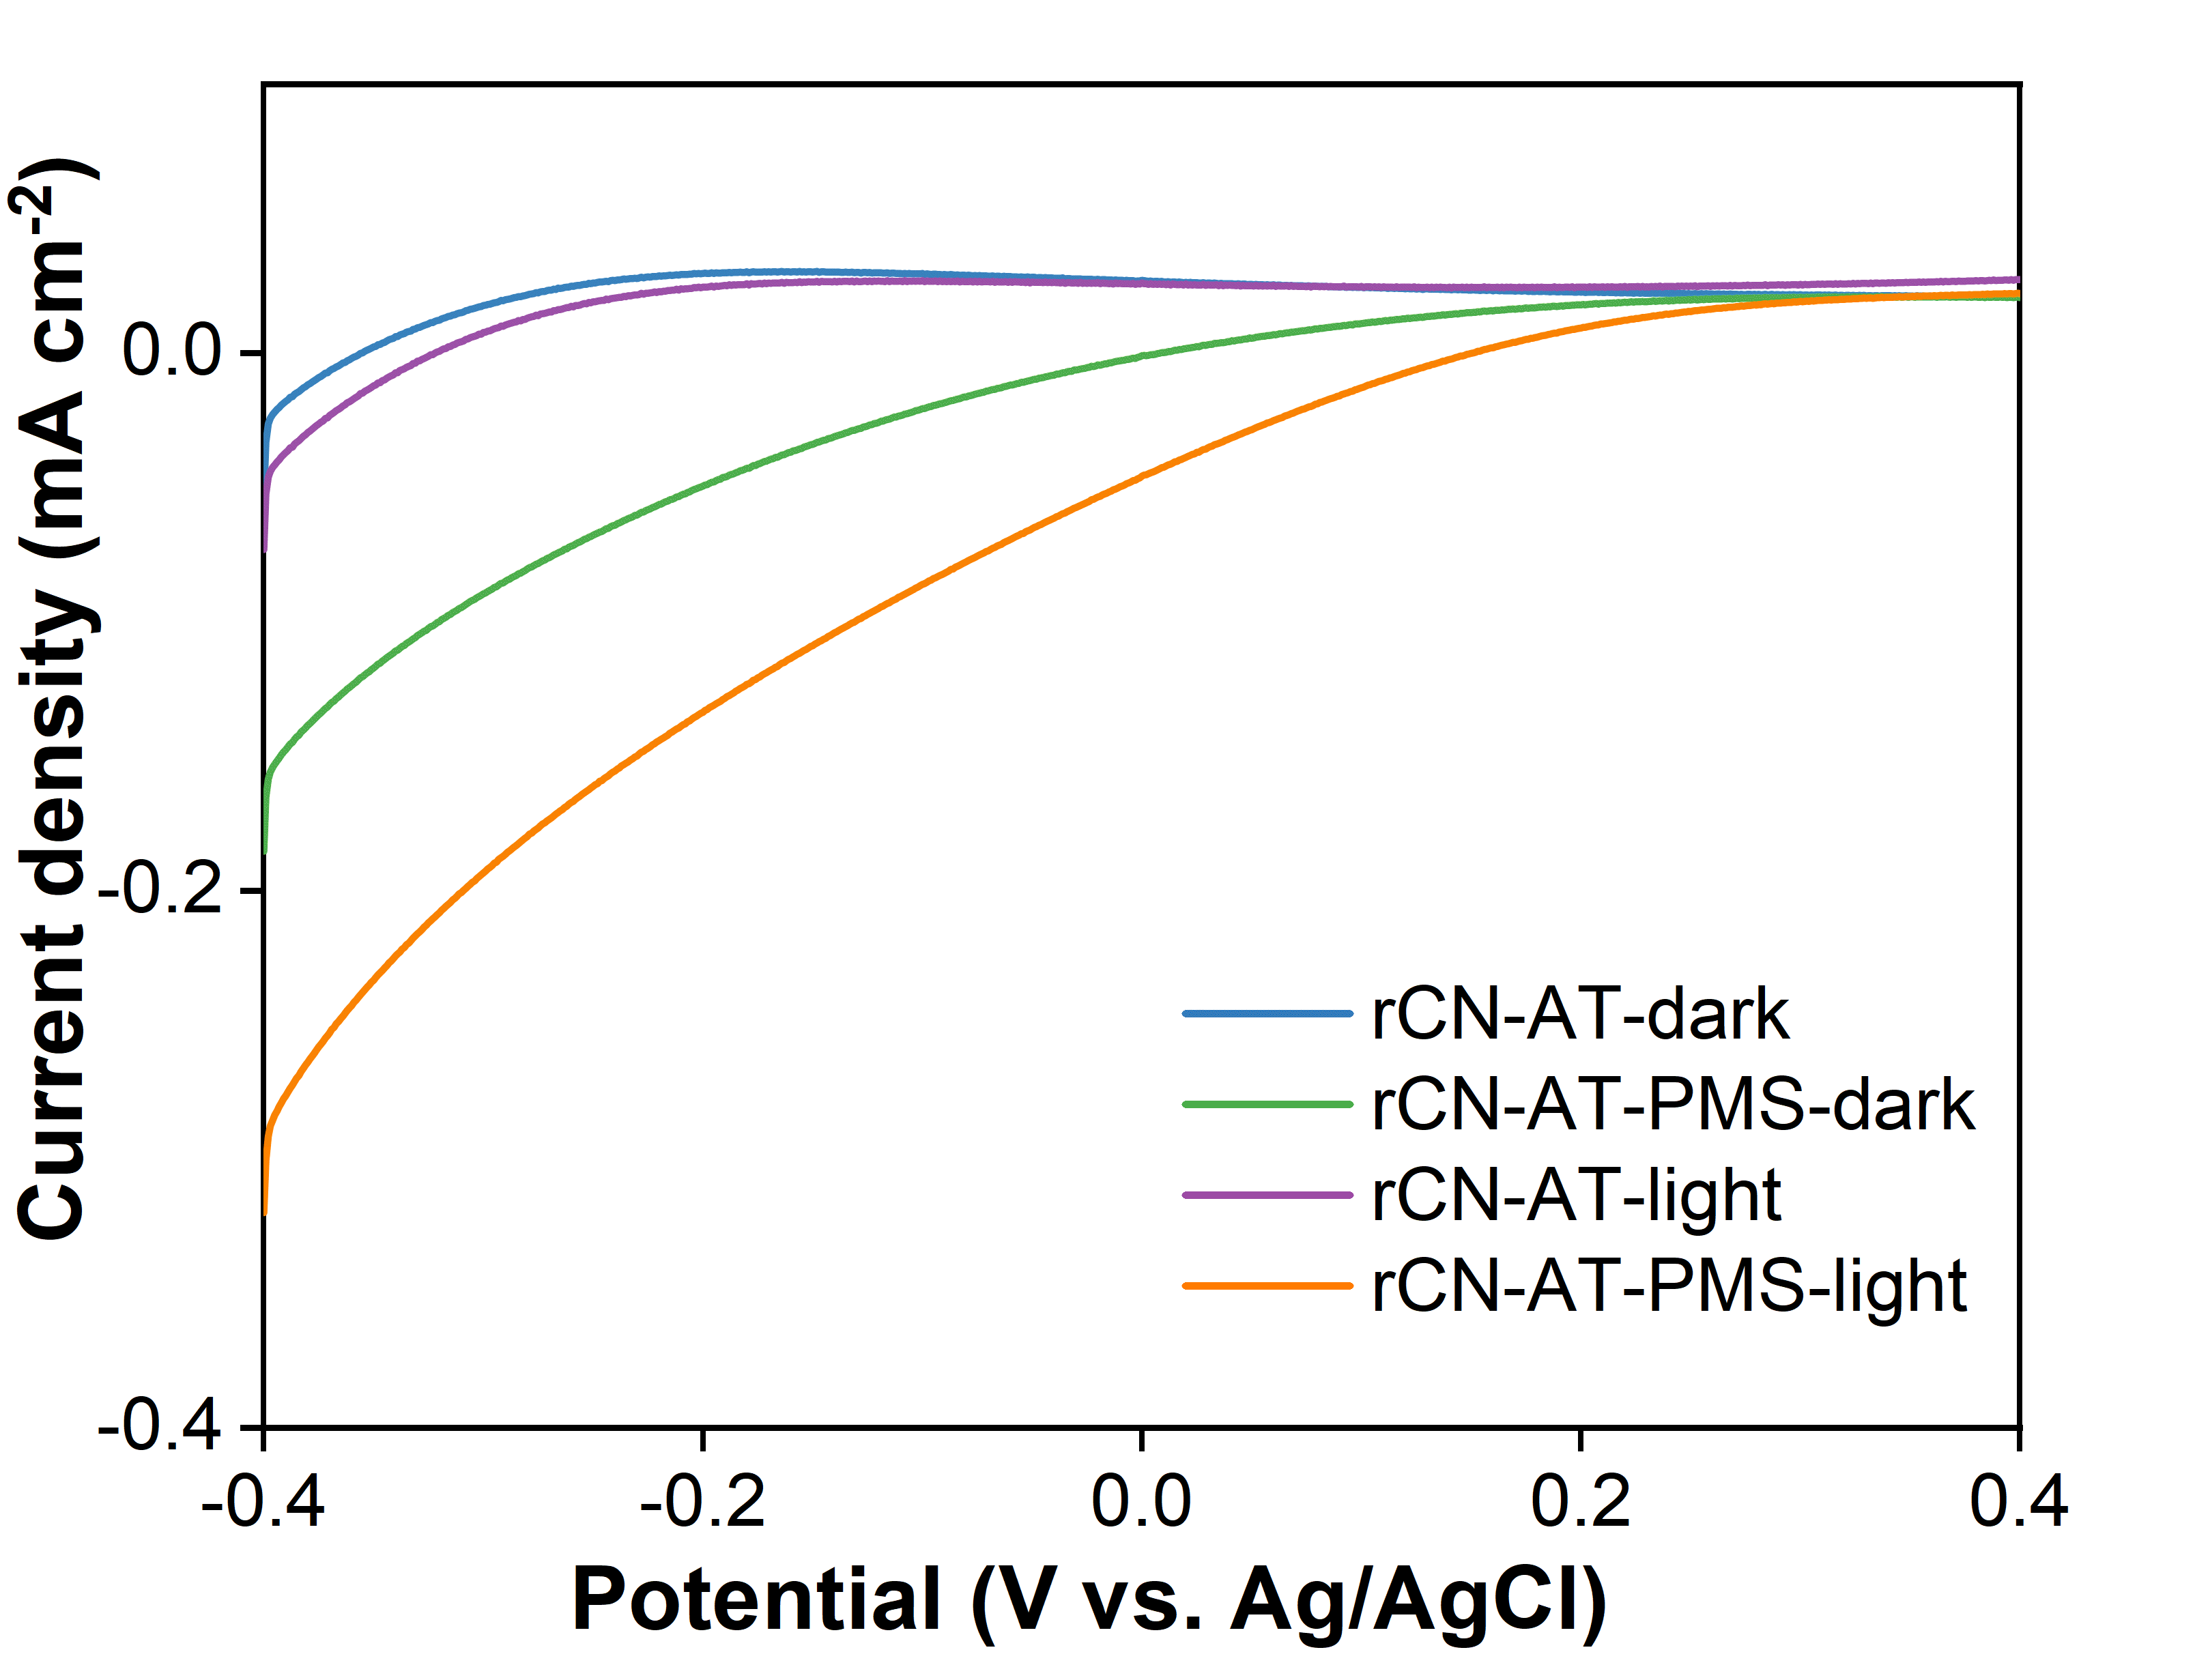


**Fig.S4** LSV curve of rCN-AT with or without visible light irradiation and PMS
